# Supplementary material for: Development of Chemometric Models Based on a LC-qToF-MS Approach to Verify the Geographic Origin of Virgin Olive Oil
Source: MDPI journal article supplement (doi:10.3390/foods10020479), 2021-02-23
Supplement: s1 [file s1]

## Supplement Information

### Development of chemometric models based on a LC-qToF-MS approach to verify the geographical origin of virgin olive oil

Ina Willenberg<sup>1\*</sup>, Alessandra Parma<sup>1</sup>, Anja Bonte<sup>1</sup>, Bertrand Matthäus<sup>1</sup>

<sup>1</sup> Max Rubner-Institut (MRI), Department of Safety and Quality of Cereals, Working Group for Lipid Research, Detmold, Germany

\* Correspondence: ina.willenberg@mri.bund.de

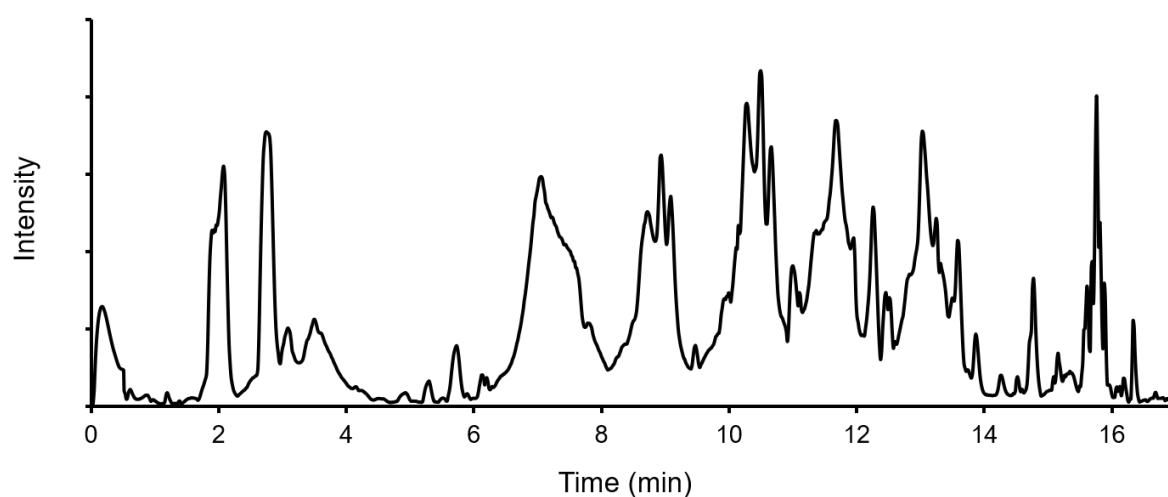

Fig. S1: HPLC-ESI-qTOF-MS chromatogram (base peak chromatogram, MS<sup>1</sup>) of the polar extract derived from olive oil.

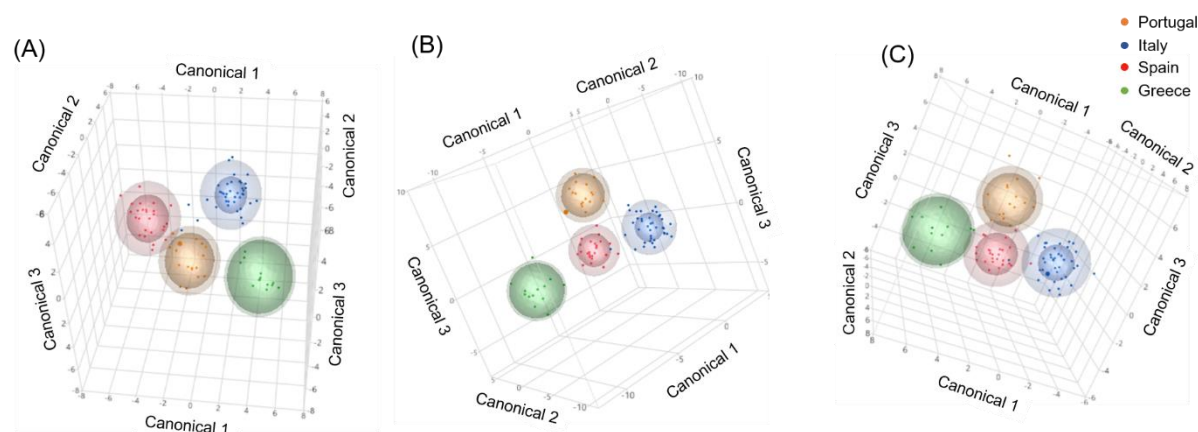

Fig. S2: Effect of number of variables used for linear discriminant analysis. Shown are normal 50% contours (outer circle) and mean CL ellipses (inner circle) in the 3D contour plot for the LDA based on PCA-LDA (A), 57 (B) and 33 variables (C). The orientation of the 3D-Plot is optimized in order to show the most appropriate view.

Tab. S1: List of features which was used for the different statistical models shown in Fig. 3 of the manuscript.

| Feature (retention time: m/z ratio) | 57 features |    | stepwise variable selection |          |         |          |         |
|-------------------------------------|-------------|----|-----------------------------|----------|---------|----------|---------|
|                                     | LDA         | LR | LDA                         | LR - Ita | LR - Pt | LR - Gre | LR - Es |
| 2.04min : 121.028m/z                | x           | x  | x                           |          |         |          | x       |
| 2.57min : 151.076m/z                | x           | x  | x                           |          |         |          |         |
| 3.00min : 509.161m/z                | x           | x  |                             |          |         |          |         |
| 4.83min : 136.016m/z                | x           | x  | x                           | x        |         | x        |         |
| 5.84min : 151.039m/z                | x           | x  | x                           |          |         | x        |         |
| 5.88min : 225.040m/z                | x           | x  |                             |          |         |          | x       |
| 6.26min : 347.036m/z                | x           | x  |                             |          |         |          |         |
| 6.27min : 229.071m/z                | x           | x  |                             |          |         |          |         |
| 6.30min : 521.126m/z                | x           | x  | x                           |          | x       |          |         |
| 6.48min : 123.044m/z                | x           | x  |                             |          |         |          |         |
| 7.04min : 149.023m/z                | x           | x  |                             |          |         |          |         |
| 7.13min : 633.178m/z                | x           | x  | x                           | x        |         |          |         |
| 7.20min : 805.208m/z                | x           | x  |                             |          |         |          |         |
| 7.72min : 257.066m/z                | x           | x  | x                           |          |         |          | x       |
| 7.85min : 635.193m/z                | x           | x  | x                           |          |         |          |         |
| 7.88min : 425.143m/z                | x           | x  |                             |          |         |          |         |
| 8.34min : 609.215m/z                | x           | x  | x                           |          |         |          |         |
| 8.61min : 395.132m/z                | x           | x  | x                           |          |         |          |         |
| 8.99min : 391.102m/z                | x           | x  | x                           |          |         |          |         |
| 9.44min : 407.097m/z                | x           | x  |                             |          |         |          |         |
| 9.44min : 409.112m/z                | x           | x  | x                           |          |         |          |         |
| 9.51min : 152.034m/z                | x           | x  |                             | x        | x       |          |         |
| 9.70min : 391.102m/z                | x           | x  | x                           | x        |         |          |         |
| 9.74min : 719.224m/z                | x           | x  | x                           |          |         |          | x       |
| 10.45min : 301.106m/z               | x           | x  | x                           | x        |         |          |         |
| 10.56min : 255.086m/z               | x           | x  | x                           |          |         |          |         |
| 10.67min : 183.065m/z               | x           | x  | x                           |          |         |          |         |
| 10.75min : 323.073m/z               | x           | x  | x                           |          |         |          |         |
| 12.16min : 593.183m/z               | x           | x  | x                           |          | x       |          |         |
| 12.50min : 651.219m/z               | x           | x  |                             |          |         |          |         |
| 14.09min : 465.138m/z               | x           | x  |                             |          |         |          |         |
| 14.11min : 631.198m/z               | x           | x  | x                           | x        |         |          |         |
| 14.15min : 321.169m/z               | x           | x  | x                           |          |         |          | x       |
| 14.43min : 331.117m/z               | x           | x  | x                           |          |         |          |         |
| 14.69min : 317.138m/z               | x           | x  |                             |          | x       |          |         |
| 14.72min : 431.128m/z               | x           | x  |                             |          |         |          |         |
| 14.77min : 347.148m/z               | x           | x  |                             | x        |         |          |         |
| 14.96min : 409.185m/z               | x           | x  |                             |          |         |          |         |
| 15.00min : 663.187m/z               | x           | x  |                             |          |         |          |         |
| 15.04min : 393.117m/z               | x           | x  | x                           |          |         |          | x       |
| 15.15min : 303.123m/z               | x           | x  |                             |          |         |          |         |

|                       |   |   |   |   |   |   |   |
|-----------------------|---|---|---|---|---|---|---|
| 15.44min : 259.191m/z | x | x | x | x |   |   | x |
| 15.54min : 253.179m/z | x | x |   |   | x |   |   |
| 15.59min : 241.180m/z | x | x | x |   | x | x | x |
| 15.60min : 311.222m/z | x | x |   |   |   |   |   |
| 15.60min : 483.329m/z | x | x | x |   |   |   | x |
| 15.64min : 433.221m/z | x | x | x | x |   |   |   |
| 15.68min : 279.195m/z | x | x |   |   |   |   |   |
| 15.68min : 361.198m/z | x | x | x |   |   |   |   |
| 15.72min : 575.356m/z | x | x | x | x | x |   |   |
| 15.73min : 635.376m/z | x | x | x |   |   |   | x |
| 15.75min : 637.386m/z | x | x |   |   |   |   |   |
| 15.76min : 591.459m/z | x | x | x |   |   |   |   |
| 15.77min : 363.214m/z | x | x |   |   |   |   | x |
| 15.84min : 569.474m/z | x | x | x |   |   |   |   |
| 15.85min : 571.359m/z | x | x |   |   |   |   |   |
| 16.07min : 361.128m/z | x | x | x |   |   |   |   |

#### **Additional Information 1: Results of statistical tests related to figure 1**

The results given in Figure 1 (B)-(D) were additionally evaluated by applying statistical tests to check for significant differences between the different groups (JMP 14.3.0; SAS Institute, Cary, North Carolina, USA).

Fig. 1 (B) – Ultrasonic treatment: Student's t-test comparing both groups (with/wo ultrasonic treatment) revealed no statistical difference for all of the phenols ( $p > 0.05$ ,  $\alpha = 0.05$ ).

Fig. 1 (C) – Evaporation temperature: ANOVA followed Tukey post-test revealed no statistical differences for the different temperatures applied during evaporation of the solvent ( $p > 0.05$ ,  $\alpha = 0.05$ ).

Fig. 1 (D) – Repeatability: ANOVA with Tukey post-test revealed differences between the days ( $p < 0.05$ ,  $\alpha = 0.05$ ) for the displayed phenols. However, no uniform trend can be observed for all phenols regarding the different days which would indicate for a systematic error (either for MS response/performance or the extraction). The variations were considered by analyzing all samples randomly in duplicate (on different days).
